# Supplementary material
Source: publisher figshare collection journal article supplement (https://gsapubs.figshare.com/ndownloader/files/28496571)
Supplement: Supplementary file 1 [file 28496571]

## Sheet: Sheet2
SN17-02B				SN17-04A				SN17-06A				SN17-09A
depth (cm)	declination (°)	inclination (°)	MAD (°)	depth (cm)	declination (°)	inclination (°)	MAD (°)	depth (cm)	declination (°)	inclination (°)	MAD (°)	depth (cm)	declination (°)	inclination (°)	MAD (°)
3	138.35	-28.4	1.7	3	-9.55	-13.6	1.4	3	13.85	-16.5	1.1	3	257.75	-14.8	0.7
5	141.35	-26.6	1.6	5	-13.15	-14	1.2	5	18.75	-15.9	0.7	5	254.75	-14.3	0.6
7	142.75	-27.4	1.8	7	-16.95	-15.1	1	7	20.55	-16.2	0.7	7	253.05	-15.8	0.7
9	142.75	-26.7	2.4	9	-21.25	-15.5	0.7	9	20.55	-16.8	0.9	9	252.55	-18.4	1
11	145.55	-23.7	1.9	11	-24.45	-14.7	0.6	11	20.65	-17.3	1.2	11	252.95	-20.3	1.3
13	147.45	-18.9	1.4	13	-24.85	-14.8	0.5	13	21.55	-18.2	1.3	13	253.25	-21.5	1.4
15	147.45	-15.2	1.6	15	-23.65	-15.8	0.7	15	22.55	-19.8	2	15	251.85	-21.1	1.3
17	147.75	-13.4	1.6	17	-21.55	-15.8	0.9	17	22.45	-17.7	2.7	17	250.45	-20.3	1.2
19	147.55	-13.3	1.6	19	-20.25	-16	1.4	19	22.65	-14.3	1.9	19	250.05	-21.1	1.7
21	145.35	-13.7	2	21	-20.95	-20.1	3.3	21	24.25	-15.3	1.4	21	250.95	-22.9	2.3
23	144.75	-14.4	2.4	23	-25.75	-31	6.4	23	26.55	-24.6	1.7	23	254.85	-26.1	2.7
25	147.95	-17.5	3.8	25	-38.45	-37.5	9.5	25	23.15	-31.6	2.5	25	257.85	-26.5	3.1
27	155.55	-24.6	6.4	27	-50.35	-30.8	8.2	27	20.35	-20.5	1.3	27	259.65	-24.4	4
29	162.95	-37.4	8	29	-56.35	-34.5	7	29	20.25	-16.3	0.9	29	258.05	-22.9	4
31	155.65	-27.1	6.7	31	179.35	-65.2	11.8	31	20.55	-16.1	0.9	31	252.65	-23.1	2.6
33	150.15	-20.9	4.6	33	129.95	-17.2	5.2	33	20.85	-17.6	0.9	33	250.25	-21.4	1
35	157.05	-20.6	4.8	35	127.45	-12.6	4.9	35	20.75	-19.7	0.8	35	249.45	-19.3	0.8
37	200.75	-33.7	14	37	128.95	-14.2	5.1	37	20.15	-20.5	0.8	37	246.95	-20	0.7
39	225.05	-40.2	10.3	39	130.55	-13	4	39	19.35	-18.6	0.9	39	245.25	-21.6	1
41	207.05	-32.8	8.2	41	131.25	-9.5	2.9	41	19.05	-17	1.2	41	247.65	-20.3	1.5
43	182.05	-25.5	8.4	43	131.45	-7.6	2.8	43	19.35	-17	1.4	43	249.65	-18.5	1.2
45	162.75	-18.3	8.6	45	129.75	-7.8	3.3	45	19.95	-17.3	1.3	45	247.55	-14	1.7
47	152.15	-17.5	7	47	126.45	-10	4	47	20.45	-17.1	1.2	47	241.75	-7	3
49	139.95	-24.1	5.4					49	20.85	-17	1.2	49	239.35	-7.2	2.5
51	140.85	-22	3.7					51	21.65	-18.3	1.2	51	240.75	-11.7	2.3
53	145.15	-20.3	3.3					53	22.05	-17.1	0.8	53	246.35	-17.9	1.8
55	147.05	-23.3	3.8					55	20.25	-14	0.7	55	253.35	-21.3	1.9
57	147.45	-23.3	3.1					57	18.25	-15.7	1.2	57	257.15	-22.9	2.2
59	148.75	-17.7	2.7					59	14.35	-20.1	1.8	59	262.75	-27.1	2
61	151.95	-13.3	3					61	11.35	-20.8	1.9
63	158.65	-9.8	4.1					63	10.45	-19.5	2
								65	10.45	-19.2	2
								67	9.75	-21.7	1.9
								69	3.85	-27.2	1.7
								71	-3.55	-29.3	1.6
								73	-0.75	-27.4	1.6
								75	7.35	-25.8	2.1
								77	15.45	-22.1	2.6
								79	19.15	-15.9	2.9
								81	20.05	-11.7	3.9
								83	23.65	-11.8	13.1
								85	202.95	11.8	5.6
								87	206.05	13.8	4.3
								89	209.15	15.3	4.3
								91	216.05	14.7	6.6

## Sheet: G48940
Wils, K., et al., 2021, Earthquake doublet revealed by multiple pulses in lacustrine seismo-turbidites: Geology, v. 49, https://doi.org/10.1130/G48940.1
